# Supplementary material for: Nonsense-Mediated Decay Enables Intron Gain in Drosophila
Source: PubMed Central journal article supplement (PMC2809761; doi:10.1371/journal.pgen.1000819), 2010-01-22
Supplement: pgen.1000819.s007.pdf [file pgen.1000819.s007.pdf]

**A**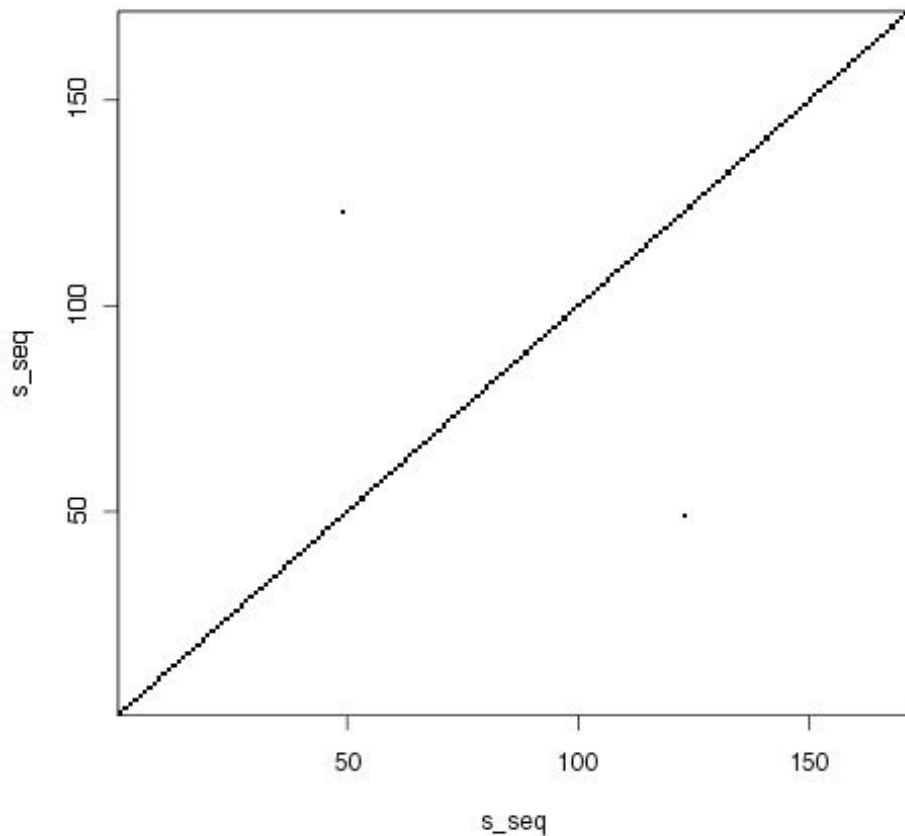**B**

```
>FBgn0034573|2R|CG3295|CG3295-PA|wil (Direct repeat 11/12 bp)
AGTCGTCACAAAAATTGGAGCAGCTTCACGAAAATGCATCGGCTGAAATAGgtgacataattat
tatggcattaacaagttaaatatcgaattttacatcttaataattaattacaaatatagGTG
ATATAGCTTCCCTGATGTCCGAGTTGGTGAAAGTACTGGGCAAGGCT
```
